# Supplementary material for: A visualized ratiometric fluorescence sensing system for copper ions based on gold nanoclusters/perovskite quantum dot@SiO2 nanocomposites
Source: Royal Society of Chemistry journal article supplement (doi:10.1039/d1an01857d), 2021-01-01
Supplement: d1an01857d1.pdf [file d1an01857d1.pdf]

## Supplementary material

### Visualized ratiometric fluorescence sensing system for copper ions based on gold nanoclusters / perovskite quantum dot@SiO<sub>2</sub> nanocomposites

Wanying Xue<sup>1,2</sup>, Jiangyan Zhong<sup>1</sup>, Haishan Wu<sup>1</sup>, Jianhua Zhang<sup>3</sup>, Yuwu  
Chi\*<sup>1</sup>

*<sup>1</sup>MOE Key Laboratory of Analytical Science of Food Safety and Biology, Fujian  
Provincial Key Laboratory of Analysis and Detection Technology for Food Safety,  
and College of Chemistry, Fuzhou University 350108, P.R. China.*

*<sup>2</sup>Department of Earth and Environmental Sciences, The University of  
Manchester, Oxford Road, Manchester, M13 9PL, U.K.*

*<sup>3</sup>Radiation Environment Supervision Station of Fujian Province, Fuzhou, 350001,  
P.R. China.*

**\* Corresponding author.**

Tel: +86 13489967315;

Fax: +86 591 22866137

E-mail address: y.w.chi@fzu.edu.cn

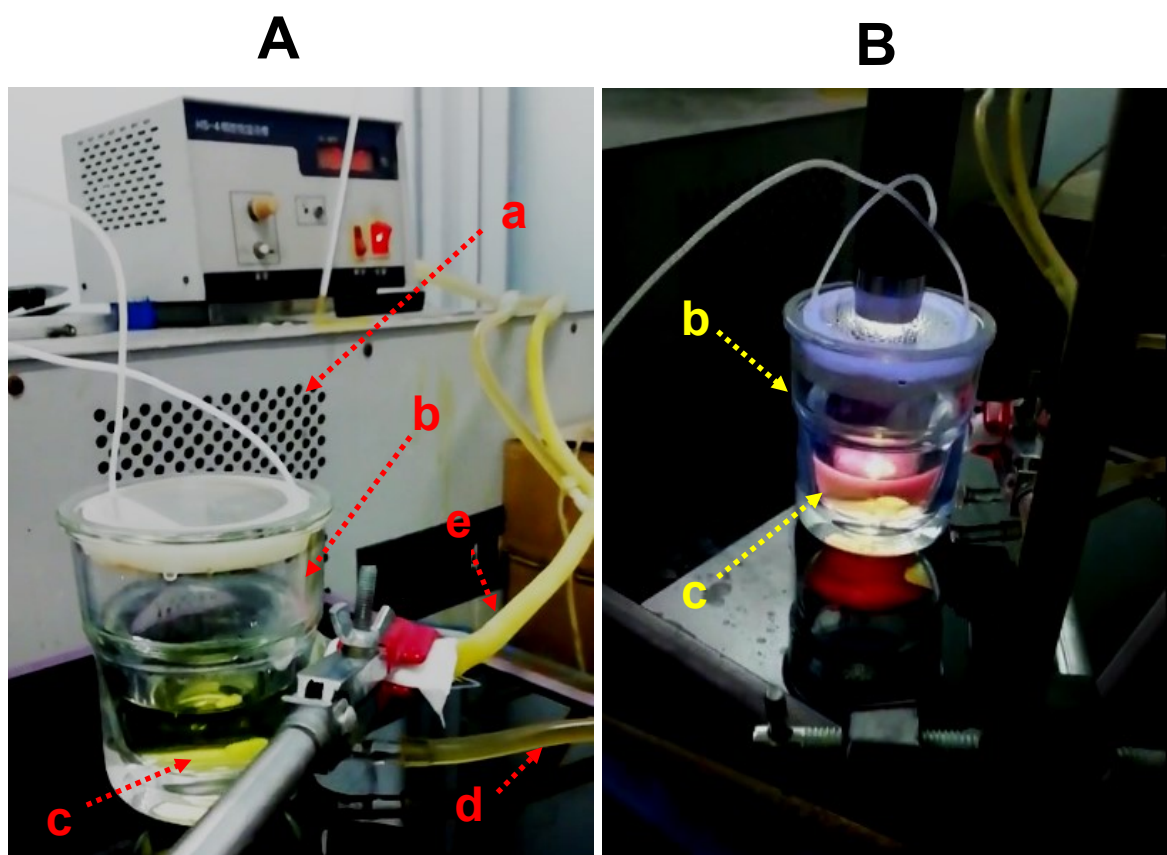

**Figure S1.** Photos of the apparatus for preparing AuNCs obtained under: (A) white light; (B) 365-nm UV light. (a) Thermostatic bath; (b) jacket Reaction beaker ; (c) reaction solution; (d) 37 C° water inlet pipe; (e) 37 C° water outlet pipe.

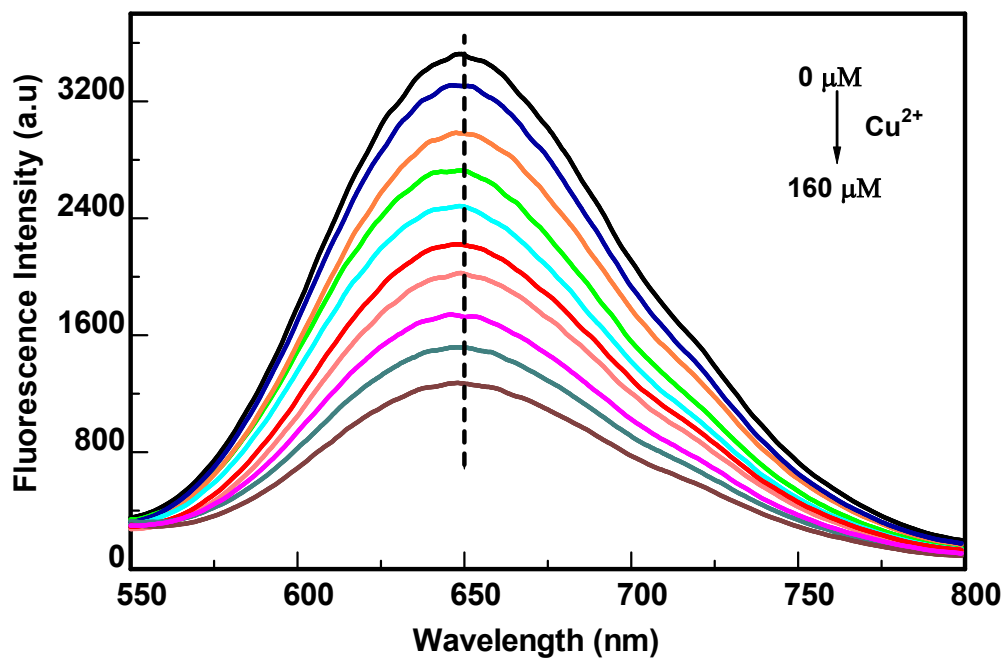

**Figure S2.** Fluorescence spectra of the fluorescence intensity changes of *AuNCs* in different concentrations of  $Cu^{2+}$ .

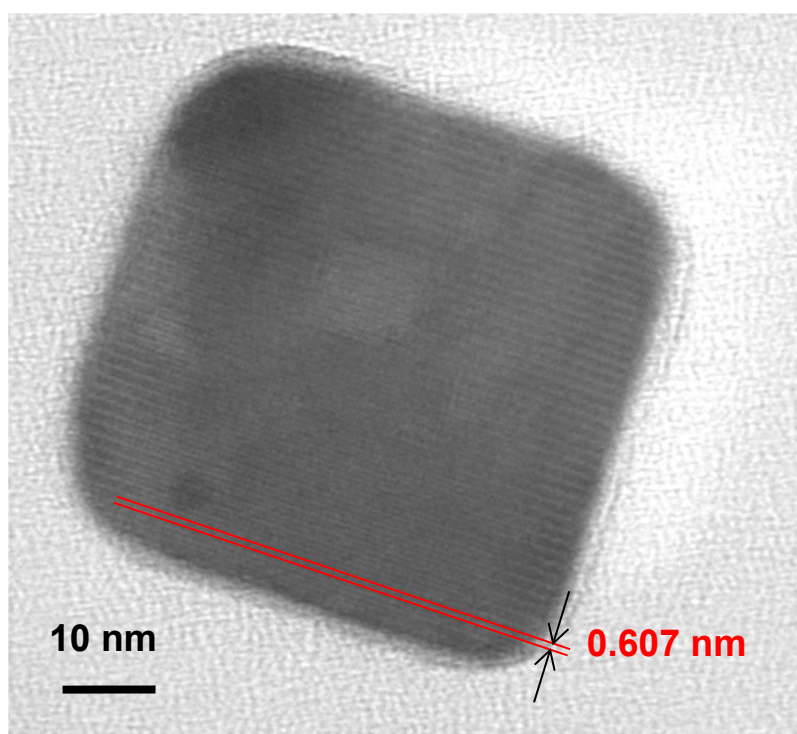

**Figure S3.** High resolution TEM image of *PVP-PQDs*.

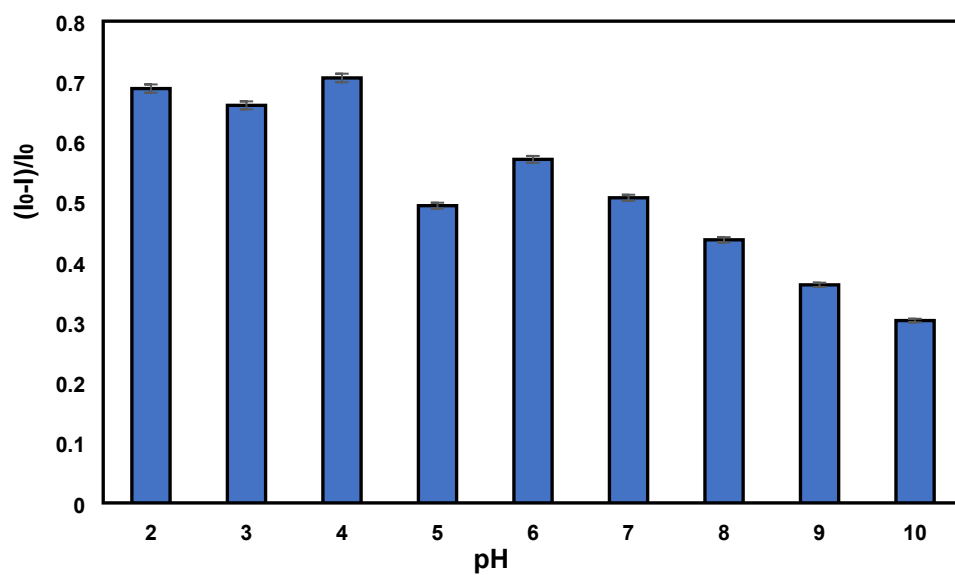

**Figure S4.** The fluorescence quenching degree of *BSA - AuNCs/PQD@SiO<sub>2</sub>* by  $Cu^{2+}$  at different pH.

**Table S1.** Recovery test for  $Cu^{2+}$  detection by  $Au\ NCs/PQD@SiO_2$ -based sensor

| Water Sample (ND*) | Spiked concentration ( $\mu M$ ) | Found in this method ( $\mu M$ ) | Average Recovery (% , n=5) | RSD (% , n=5) |
|--------------------|----------------------------------|----------------------------------|----------------------------|---------------|
|                    | 17                               | 18.52                            | 108.94                     | 4.47          |
| Min River          | 50                               | 50.06                            | 101.21                     | 2.18          |
|                    | 150                              | 149.59                           | 99.73                      | 3.11          |

ND\*: Negative detection
